# Supplementary material for: Involvement of Skeletal Muscle Gene Regulatory Network in Susceptibility to Wound Infection Following Trauma
Source: PLOS journal article supplement (doi:10.1371/journal.pone.0001356), 2007-12-26

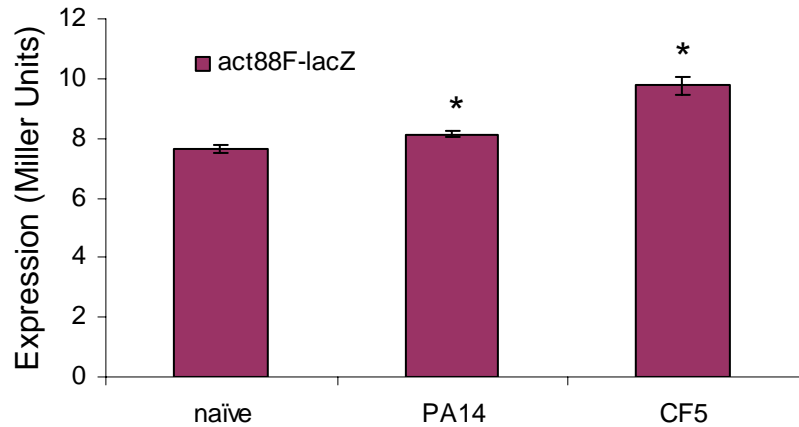

Supplement: S1 (10.1371/journal.pone.0001356.s001) [file journal.pone.0001356.s001]
