# Supplementary material for: Involvement of Skeletal Muscle Gene Regulatory Network in Susceptibility to Wound Infection Following Trauma
Source: PLOS journal article supplement (doi:10.1371/journal.pone.0001356), 2007-12-26

**A**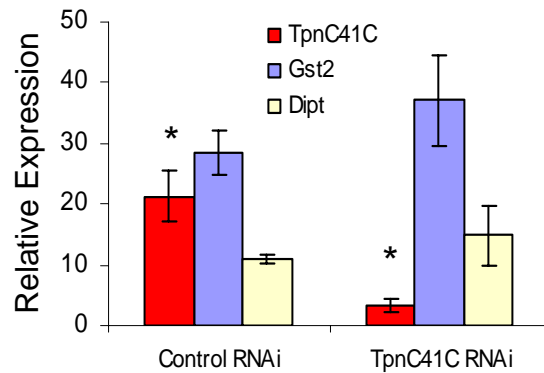**B**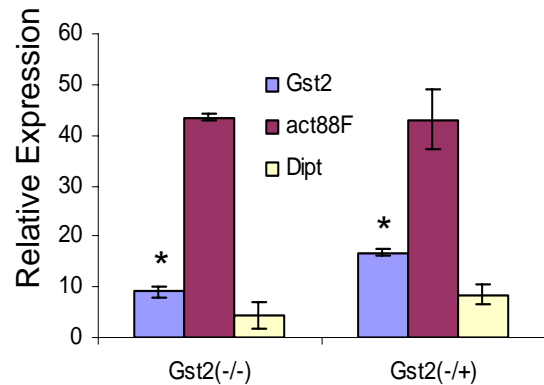**C**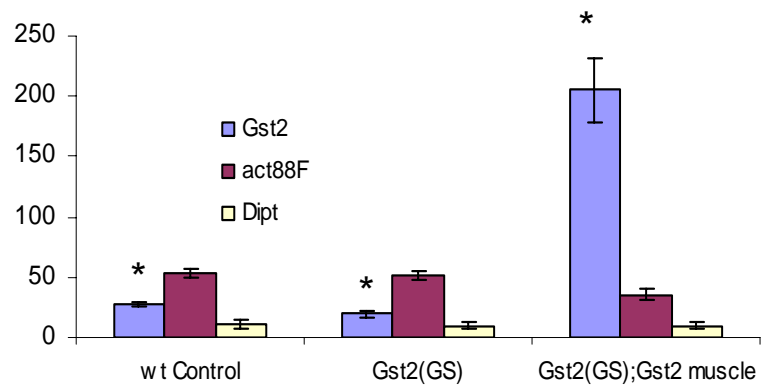

Supplement: S2 (10.1371/journal.pone.0001356.s002) [file journal.pone.0001356.s002]
