# Supplementary material for: Involvement of Skeletal Muscle Gene Regulatory Network in Susceptibility to Wound Infection Following Trauma
Source: PLOS journal article supplement (doi:10.1371/journal.pone.0001356), 2007-12-26

## Wild type muscle EM

A

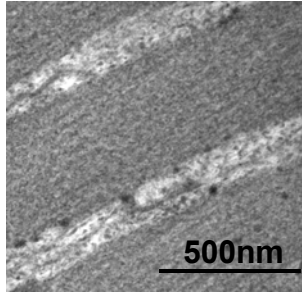

## *hep<sup>1</sup>* muscle EM

B

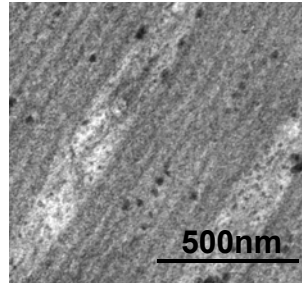

Supplement: S6 (10.1371/journal.pone.0001356.s006) [file journal.pone.0001356.s006]
